# Supplementary material
Source: MDPI journal article supplement (https://www.mdpi.com/2075-5309/12/6/816)
Supplement: s1 [file s1]

Table S1. CGLUE factors values of 11 counties in 2010

| Factor                                                                           | Chengdu | Zigong  | Panzhihua | Luzhou  | Deyang  | Mianyang | Guangyuan | Suining | Meishan | Yibin   | Yaan   |
|----------------------------------------------------------------------------------|---------|---------|-----------|---------|---------|----------|-----------|---------|---------|---------|--------|
| Total investment in fixed assets by region                                       | 4022    | 243     | 265       | 351     | 748     | 802      | 439       | 403     | 371     | 408     | 335    |
| Administrative area (sq.km)                                                      | 12000   | 4000    | 7000      | 12000   | 6000    | 20000    | 16000     | 5000    | 7000    | 13000   | 15000  |
| Number of employed persons in secondary and tertiary industries (10 000 persons) | 587     | 113     | 43        | 124     | 118     | 169      | 76        | 88      | 85      | 155     | 48     |
| GDP in secondary and tertiary industries (100 million yuan)                      | 4235    | 461     | 404       | 487     | 647     | 663      | 198       | 311     | 368     | 597     | 195    |
| Average wage of staff and workers (yuan)                                         | 26877   | 20932   | 26561     | 20259   | 24998   | 22537    | 21754     | 19783   | 19646   | 23236   | 20410  |
| Basic statistics on per capita park green area (hectare)                         | 4       | 2       | 4         | 1       | 1       | 1        | 1         | 1       | 1       | 1       | 1      |
| Carbon emissions of land                                                         | 3014986 | 1225430 | 10215432  | 4994402 | 1073239 | 1701455  | 1627140   | 573320  | 931160  | 3970495 | 493851 |
| Volume of industrial wastewater discharged (10000 tons)                          | 24553   | 2329    | 1771      | 6522    | 5372    | 9781     | 2790      | 3095    | 4238    | 11143   | 1514   |
| Volume of industrial sulphur dioxide emission (ton)                              | 93045   | 33321   | 102724    | 83707   | 20016   | 43758    | 32153     | 8089    | 17298   | 80954   | 5487   |
| Volume of industrial soot (dust) emission (ton)                                  | 36670   | 5676    | 6293      | 8098    | 3959    | 19468    | 13712     | 7089    | 27103   | 7641    | 2993   |

Table S2. CGLUE factors values of 11 counties in 2011

| Factor                                                                           | Chengdu | Zigong  | Panzhihua | Luzhou  | Deyang  | Mianyang | Guangyuan | Suining | Meishan | Yibin   | Yaan   |
|----------------------------------------------------------------------------------|---------|---------|-----------|---------|---------|----------|-----------|---------|---------|---------|--------|
| Total investment in fixed assets by region                                       | 4255    | 320     | 331       | 460     | 601     | 821      | 480       | 495     | 420     | 534     | 371    |
| Administrative area (sq.km)                                                      | 12000   | 4000    | 7000      | 12000   | 6000    | 20000    | 16000     | 5000    | 7000    | 13000   | 15000  |
| Number of employed persons in secondary and tertiary industries (10 000 persons) | 614     | 110     | 44        | 127     | 115     | 165      | 80        | 93      | 92      | 156     | 51     |
| GDP in secondary and tertiary industries (100 million yuan)                      | 5266    | 563     | 503       | 606     | 769     | 794      | 245       | 386     | 448     | 737     | 237    |
| Average wage of staff and workers (yuan)                                         | 30515   | 23223   | 30029     | 22448   | 28355   | 26347    | 25328     | 22621   | 22897   | 25265   | 23065  |
| Basic statistics on per capita park green area (hectare)                         | 4       | 3       | 4         | 2       | 1       | 2        | 1         | 1       | 1       | 1       | 3      |
| Carbon emissions of land                                                         | 3193887 | 1225430 | 12865528  | 5742445 | 1107081 | 2459194  | 1967331   | 635273  | 931160  | 4564499 | 493851 |
| Volume of industrial wastewater discharged (10000 tons)                          | 12558   | 2781    | 1904      | 6267    | 5448    | 9492     | 2783      | 3560    | 10409   | 12256   | 1943   |
| Volume of industrial sulphur dioxide emission (ton)                              | 61928   | 36611   | 100568    | 91275   | 22641   | 46081    | 35365     | 10989   | 20818   | 86786   | 6652   |
| Volume of industrial soot (dust) emission (ton)                                  | 28901   | 13556   | 25025     | 9014    | 5332    | 19843    | 19667     | 1392    | 28201   | 7550    | 2786   |

Table S3. CGLUE factors values of 11 counties in 2012

| Factor                                                                           | Chengdu | Zigong  | Panzhihua | Luzhou  | Deyang  | Mianyang | Guangyuan | Suining | Meishan | Yibin   | Yaan    |
|----------------------------------------------------------------------------------|---------|---------|-----------|---------|---------|----------|-----------|---------|---------|---------|---------|
| Total investment in fixed assets by region                                       | 4996    | 353     | 383       | 524     | 650     | 881      | 498       | 536     | 450     | 607     | 341     |
| Administrative area (sq.km)                                                      | 12000   | 4000    | 7000      | 12000   | 6000    | 20000    | 16000     | 5000    | 7000    | 13000   | 15000   |
| Number of employed persons in secondary and tertiary industries (10 000 persons) | 640     | 117     | 49        | 128     | 124     | 172      | 81        | 94      | 93      | 161     | 54      |
| GDP in secondary and tertiary industries (100 million yuan)                      | 6623    | 681     | 621       | 770     | 960     | 990      | 320       | 462     | 552     | 928     | 293     |
| Average wage of staff and workers (yuan)                                         | 34008   | 27975   | 35997     | 27053   | 32325   | 31717    | 30548     | 27316   | 27782   | 30068   | 28061   |
| Basic statistics on per capita park green area (hectare)                         | 4       | 3       | 5         | 2       | 1       | 2        | 2         | 1       | 1       | 2       | 1       |
| Carbon emissions of land                                                         | 4192788 | 1225430 | 13935183  | 5769430 | 1015906 | 2644835  | 2168895   | 681691  | 931160  | 6082109 | 831120  |
| Volume of industrial wastewater discharged (10000 tons)                          | 12904   | 2540    | 2272      | 3513    | 6914    | 9625     | 1197      | 1794    | 2924    | 7613    | 1758    |
| Volume of industrial sulphur dioxide emission (ton)                              | 108723  | 42410   | 130898    | 172233  | 104563  | 100727   | 26359     | 10327   | 29959   | 173926  | 38712   |
| Volume of industrial soot (dust) emission (ton)                                  | 22227   | 10000   | 52938     | 13918   | 13536   | 17033    | 26821     | 4396    | 26079   | 21269   | 1047526 |

Table S4. CGLUE factors values of 11 counties in 2013

| Factor                                                                           | Chengdu | Zigong  | Panzhihua | Luzhou  | Deyang  | Mianyang | Guangyuan | Suining | Meishan | Yibin   | Yaan   |
|----------------------------------------------------------------------------------|---------|---------|-----------|---------|---------|----------|-----------|---------|---------|---------|--------|
| Total investment in fixed assets by region                                       | 5890    | 435     | 463       | 671     | 731     | 932      | 515       | 655     | 602     | 749     | 357    |
| Administrative area (sq.km)                                                      | 12119   | 4381    | 7401      | 12236   | 5910    | 20248    | 16311     | 5323    | 7140    | 13266   | 15046  |
| Number of employed persons in secondary and tertiary industries (10 000 persons) | 649     | 122     | 45        | 129     | 126     | 181      | 79        | 98      | 91      | 172     | 63     |
| GDP in secondary and tertiary industries (100 million yuan)                      | 7791    | 775     | 714       | 887     | 1086    | 1127     | 377       | 532     | 639     | 1061    | 338    |
| Average wage of staff and workers (yuan)                                         | 38221   | 32681   | 40846     | 31340   | 36684   | 35544    | 34030     | 30641   | 33034   | 34670   | 32837  |
| Basic statistics on per capita park green area (hectare)                         | 4       | 4       | 5         | 2       | 1       | 2        | 2         | 2       | 1       | 2       | 2      |
| Carbon emissions of land                                                         | 3515895 | 1225430 | 12757354  | 4088415 | 1038074 | 2410636  | 2176126   | 546917  | 931160  | 7018714 | 557146 |
| Volume of industrial wastewater discharged (10000 tons)                          | 11780   | 2293    | 4011      | 3707    | 6386    | 6798     | 399       | 1529    | 6448    | 8404    | 1028   |
| Volume of industrial sulphur dioxide emission (ton)                              | 122398  | 31875   | 151074    | 176307  | 107505  | 89467    | 21111     | 11598   | 0       | 378325  | 46678  |
| Volume of industrial soot (dust) emission (ton)                                  | 3484497 | 262709  | 2549668   | 1211492 | 935899  | 2382433  | 1124212   | 42759   | 798109  | 2522831 | 696818 |

Table S5. CGLUE factors values of 11 counties in 2014

| Factor                                                                           | Chengdu | Zigong  | Panzhihua | Luzhou  | Deyang | Mianyang | Guangyuan | Suining | Meishan | Yibin   | Yaan   |
|----------------------------------------------------------------------------------|---------|---------|-----------|---------|--------|----------|-----------|---------|---------|---------|--------|
| Total investment in fixed assets by region                                       | 6501    | 532     | 546       | 866     | 807    | 1001     | 541       | 805     | 756     | 935     | 353    |
| Administrative area (sq.km)                                                      | 12119   | 4381    | 7401      | 12236   | 5910   | 20248    | 16311     | 5323    | 7140    | 13266   | 15046  |
| Number of employed persons in secondary and tertiary industries (10 000 persons) | 683     | 128     | 51        | 141     | 137    | 191      | 81        | 100     | 91      | 164     | 59     |
| GDP in secondary and tertiary industries (100 million yuan)                      | 8756    | 882     | 773       | 985     | 1201   | 1216     | 424       | 604     | 715     | 1144    | 355    |
| Average wage of staff and workers (yuan)                                         | 48358   | 37081   | 44220     | 37648   | 41426  | 40989    | 37300     | 34633   | 36595   | 38674   | 35464  |
| Basic statistics on per capita park green area (hectare)                         | 4       | 4       | 5         | 2       | 1      | 2        | 2         | 2       | 1       | 2       | 2      |
| Carbon emissions of land                                                         | 2999207 | 2126350 | 13744122  | 2630862 | 997221 | 2257709  | 545796    | 443891  | 931160  | 6396313 | 443034 |
| Volume of industrial wastewater discharged (10000 tons)                          | 10524   | 1828    | 4138      | 3541    | 6638   | 5788     | 364       | 1111    | 3974    | 5825    | 1168   |
| Volume of industrial sulphur dioxide emission (ton)                              | 115512  | 36539   | 158621    | 170305  | 32474  | 82086    | 20930     | 12024   | 23245   | 450541  | 42476  |
| Volume of industrial soot (dust) emission (ton)                                  | 2342401 | 184645  | 2663186   | 1065674 | 809035 | 2232063  | 1015843   | 41907   | 535926  | 2492645 | 261206 |

Table S6. CGLUE factors values of 11 counties in 2015

| Factor                                                                                 | Chengdu | Zigong  | Panzhihua | Luzhou  | Deyang | Mianyang | Guangyuan | Suining | Meishan | Yibin   | Yaan   |
|----------------------------------------------------------------------------------------|---------|---------|-----------|---------|--------|----------|-----------|---------|---------|---------|--------|
| Total investment in fixed assets by region                                             | 6620    | 598     | 617       | 1181    | 895    | 1080     | 562       | 914     | 923     | 1130    | 471    |
| Administrative area (sq.km)                                                            | 12119   | 4381    | 7401      | 12236   | 5910   | 20248    | 16311     | 5323    | 7140    | 13266   | 15046  |
| Number of employed persons in<br>secondary and tertiary industries (10 000<br>persons) | 691     | 130     | 51        | 141     | 140    | 195      | 85        | 101     | 100     | 167     | 57     |
| GDP in secondary and tertiary industries<br>(100 million yuan)                         | 9700    | 952     | 842       | 1100    | 1316   | 1332     | 470       | 673     | 796     | 1237    | 396    |
| Average wage of staff and workers<br>(yuan)                                            | 51681   | 40162   | 50221     | 41121   | 44169  | 44640    | 41518     | 37894   | 41161   | 40978   | 39548  |
| Basic statistics on per capita park green<br>area (hectare)                            | 5       | 4       | 5         | 2       | 2      | 2        | 2         | 2       | 2       | 2       | 2      |
| Carbon emissions of land                                                               | 2623678 | 1601336 | 14146851  | 2471258 | 929363 | 1978715  | 2766723   | 3471029 | 931160  | 6396313 | 387264 |
| Volume of industrial wastewater<br>discharged (10000 tons)                             | 10064   | 1684    | 2553      | 3084    | 6506   | 5614     | 329       | 1478    | 3974    | 8560    | 967    |
| Volume of industrial sulphur dioxide<br>emission (ton)                                 | 146175  | 28211   | 200429    | 143651  | 31331  | 77144    | 19221     | 12147   | 22648   | 451583  | 38178  |
| Volume of industrial soot (dust) emission<br>(ton)                                     | 2342401 | 184645  | 2663186   | 1065674 | 809035 | 2232063  | 1015843   | 41907   | 535926  | 2492645 | 261206 |

Table S7. CGLUE factors values of 11 counties in 2016

| Factor                                                                           | Chengdu | Zigong  | Panzhihua | Luzhou  | Deyang  | Mianyang | Guangyuan | Suining | Meishan | Yibin   | Yaan   |
|----------------------------------------------------------------------------------|---------|---------|-----------|---------|---------|----------|-----------|---------|---------|---------|--------|
| Total investment in fixed assets by region                                       | 7007    | 639     | 645       | 1464    | 981     | 1154     | 583       | 1012    | 1032    | 1296    | 531    |
| Administrative area (sq.km)                                                      | 12119   | 4381    | 7401      | 12236   | 5910    | 20248    | 16311     | 5323    | 7140    | 13266   | 15046  |
| Number of employed persons in secondary and tertiary industries (10 000 persons) | 725     | 116     | 43        | 145     | 142     | 207      | 93        | 89      | 101     | 169     | 52     |
| GDP in secondary and tertiary industries (100 million yuan)                      | 10428   | 1015    | 894       | 1186    | 1397    | 1440     | 506       | 774     | 870     | 1310    | 430    |
| Average wage of staff and workers (yuan)                                         | 57480   | 43157   | 51999     | 44749   | 48090   | 49817    | 46888     | 42188   | 45379   | 46019   | 42533  |
| Basic statistics on per capita park green area (hectare)                         | 5       | 4       | 6         | 3       | 2       | 3        | 2         | 2       | 2       | 2       | 2      |
| Carbon emissions of land                                                         | 2332916 | 1608108 | 13361590  | 2216075 | 874611  | 1582021  | 3104685   | 258020  | 1598479 | 5306109 | 427514 |
| Volume of industrial wastewater discharged (10000 tons)                          | 11454   | 1693    | 2432      | 3745    | 5411    | 6890     | 407       | 1419    | 6402    | 22125   | 815    |
| Volume of industrial sulphur dioxide emission (ton)                              | 116920  | 21396   | 139682    | 129549  | 33314   | 67169    | 24182     | 11414   | 27932   | 320138  | 29647  |
| Volume of industrial soot (dust) emission (ton)                                  | 1389828 | 235581  | 1610717   | 333124  | 1118702 | 2255500  | 512383    | 40815   | 363770  | 2405613 | 85572  |

Table S8. CGLUE factors values of 11 counties in 2017

| Factor                                                                           | Chengdu | Zigong  | Panzhihua | Luzhou  | Deyang  | Mianyang | Guangyuan | Suining | Meishan | Yibin   | Yaan   |
|----------------------------------------------------------------------------------|---------|---------|-----------|---------|---------|----------|-----------|---------|---------|---------|--------|
| Total investment in fixed assets by region                                       | 8371    | 710     | 696       | 1730    | 1125    | 1270     | 618       | 1126    | 1164    | 1465    | 551    |
| Administrative area (sq.km)                                                      | 14335   | 4381    | 7401      | 12236   | 5910    | 20248    | 16311     | 5323    | 7140    | 13266   | 15046  |
| Number of employed persons in secondary and tertiary industries (10 000 persons) | 769     | 104     | 43        | 151     | 145     | 213      | 94        | 91      | 104     | 171     | 53     |
| GDP in secondary and tertiary industries (100 million yuan)                      | 11695   | 1098    | 980       | 1304    | 1533    | 1550     | 554       | 855     | 948     | 1421    | 469    |
| Average wage of staff and workers (yuan)                                         | 61330   | 46595   | 55508     | 47871   | 52249   | 53222    | 51379     | 45840   | 48293   | 49966   | 46458  |
| Basic statistics on per capita park green area (hectare)                         | 6       | 4       | 6         | 3       | 2       | 3        | 2         | 2       | 2       | 2       | 2      |
| Carbon emissions of land                                                         | 2332916 | 1283120 | 12669043  | 2237995 | 740290  | 1411438  | 2495142   | 258020  | 1009849 | 5411498 | 444837 |
| Volume of industrial wastewater discharged (10000 tons)                          | 9262    | 1262    | 0         | 3050    | 4191    | 2576     | 332       | 1373    | 0       | 0       | 634    |
| Volume of industrial sulphur dioxide emission (ton)                              | 67877   | 13310   | 0         | 95822   | 25742   | 18356    | 7953      | 11561   | 0       | 0       | 39439  |
| Volume of industrial soot (dust) emission (ton)                                  | 1417322 | 326949  | 0         | 176417  | 1014595 | 843411   | 245459    | 41896   | 0       | 0       | 230128 |



Table S9. CGLUE factors values of 11 counties in 2018

| Factor                                                                           | Chengdu | Zigong | Panzhihua | Luzhou  | Deyang | Mianyang | Guangyuan | Suining | Meishan | Yibin   | Yaan   |
|----------------------------------------------------------------------------------|---------|--------|-----------|---------|--------|----------|-----------|---------|---------|---------|--------|
| Total investment in fixed assets by region                                       | 9404    | 832    | 745       | 2042    | 1311   | 1437     | 715       | 1258    | 1111    | 1685    | 461    |
| Administrative area (sq.km)                                                      | 14335   | 4381   | 7401      | 12236   | 5910   | 20248    | 16311     | 5323    | 7140    | 13266   | 15046  |
| Number of employed persons in secondary and tertiary industries (10 000 persons) | 785     | 105    | 44        | 148     | 143    | 215      | 96        | 94      | 105     | 174     | 54     |
| GDP in secondary and tertiary industries (100 million yuan)                      | 13389   | 1169   | 1107      | 1413    | 1732   | 1783     | 619       | 978     | 1007    | 1608    | 522    |
| Average wage of staff and workers (yuan)                                         | 65098   | 52339  | 61005     | 52455   | 56815  | 56966    | 54086     | 49962   | 52410   | 54195   | 48895  |
| Basic statistics on per capita park green area (hectare)                         | 7       | 4      | 7         | 4       | 2      | 3        | 2         | 2       | 2       | 3       | 2      |
| Carbon emissions of land                                                         | 2148573 | 713462 | 8811305   | 2282775 | 759155 | 1405210  | 2324616   | 183753  | 729761  | 4357784 | 486632 |
| Volume of industrial wastewater discharged (10000 tons)                          | 8319    | 929    | 0         | 3405    | 0      | 0        | 222       | 0       | 2542    | 6107    | 0      |
| Volume of industrial sulphur dioxide emission (ton)                              | 0       | 2833   | 0         | 12752   | 0      | 0        | 4251      | 0       | 10390   | 26733   | 0      |
| Volume of industrial soot (dust) emission (ton)                                  | 0       | 2178   | 0         | 6508    | 0      | 0        | 3519      | 0       | 7937    | 7739    | 0      |

Table S10. CGLUE factors values of 11 counties in 2019

| Factor                                                                           | Chengdu | Zigong | Panzhihua | Luzhou  | Deyang | Mianyang | Guangyuan | Suining | Meishan | Yibin   | Yaan   |
|----------------------------------------------------------------------------------|---------|--------|-----------|---------|--------|----------|-----------|---------|---------|---------|--------|
| Total investment in fixed assets by region                                       | 11182   | 856    | 760       | 2114    | 1439   | 1686     | 851       | 1436    | 1193    | 1835    | 502    |
| Administrative area (sq.km)                                                      | 14335   | 4381   | 7401      | 12236   | 5910   | 20248    | 16311     | 5323    | 7140    | 13266   | 15046  |
| Number of employed persons in secondary and tertiary industries (10 000 persons) | 792     | 107    | 44        | 151     | 145    | 218      | 98        | 95      | 107     | 177     | 56     |
| GDP in secondary and tertiary industries (100 million yuan)                      | 14820   | 1255   | 1134      | 1504    | 1971   | 2003     | 684       | 1056    | 1070    | 1778    | 560    |
| Average wage of staff and workers (yuan)                                         | 71300   | 56040  | 65124     | 58614   | 62612  | 63500    | 58362     | 56261   | 59325   | 62126   | 53231  |
| Basic statistics on per capita park green area (hectare)                         | 7       | 5      | 7         | 5       | 2      | 3        | 3         | 3       | 2       | 4       | 2      |
| Carbon emissions of land                                                         | 2054936 | 592093 | 7153572   | 2391348 | 756264 | 1545576  | 2239067   | 148164  | 687049  | 3815252 | 408881 |
| Volume of industrial wastewater discharged (10000 tons)                          | 7911    | 867    | 4668      | 3993    | 3494   | 1428     | 511       | 1060    | 0       | 5900    | 566    |
| Volume of industrial sulphur dioxide emission (ton)                              | 7741    | 1832   | 44895     | 11033   | 6334   | 6970     | 3223      | 1404    | 0       | 22442   | 3955   |
| Volume of industrial soot (dust) emission (ton)                                  | 8541    | 1321   | 35016     | 5285    | 7185   | 12185    | 3806      | 737     | 0       | 9990    | 3634   |

Table S11. CGLUE factors values of 11 counties in 2020

| Factor                                                                           | Chengdu | Zigong | Panzhihua | Luzhou  | Deyang | Mianyang | Guangyuan | Suining | Meishan | Yibin   | Yaan   |
|----------------------------------------------------------------------------------|---------|--------|-----------|---------|--------|----------|-----------|---------|---------|---------|--------|
| Total investment in fixed assets by region                                       | 12099   | 1011   | 856       | 2302    | 1590   | 1872     | 971       | 1640    | 1170    | 2059    | 572    |
| Administrative area (sq.km)                                                      | 14335   | 4381   | 7401      | 12236   | 5910   | 20248    | 16311     | 5323    | 7140    | 13266   | 15046  |
| Number of employed persons in secondary and tertiary industries (10 000 persons) | 811     | 109    | 44        | 153     | 147    | 220      | 98        | 100     | 109     | 176     | 57     |
| GDP in secondary and tertiary industries (100 million yuan)                      | 16400   | 1226   | 918       | 1864    | 2101   | 2554     | 789       | 1161    | 1181    | 2324    | 596    |
| Average wage of staff and workers (yuan)                                         | 79664   | 56719  | 68016     | 61868   | 63585  | 63700    | 63544     | 59290   | 62444   | 66048   | 62179  |
| Basic statistics on per capita park green area (hectare)                         | 7       | 5      | 7         | 5       | 3      | 4        | 3         | 3       | 3       | 4       | 3      |
| Carbon emissions of land                                                         | 1868504 | 653544 | 6836825   | 2302312 | 739713 | 1701455  | 2208941   | 113330  | 630663  | 1822274 | 458228 |
| Volume of industrial wastewater discharged (10000 tons)                          | 9290    | 1051   | 4912      | 4192    | 3579   | 1922     | 670       | 1254    | 1651    | 6586    | 786    |
| Volume of industrial sulphur dioxide emission (ton)                              | 6104    | 1356   | 44828     | 10354   | 5550   | 4579     | 2448      | 1958    | 6904    | 13038   | 3693   |
| Volume of industrial soot (dust) emission (ton)                                  | 8925    | 2367   | 34992     | 5251    | 5947   | 9472     | 3777      | 1651    | 6269    | 10465   | 3322   |

Table S12. 11 Counties CGLUE from 2010 to 2020

| County  | Year | CGLUE | County    | Year | CGLUE | County    | Year | CGLUE | County    | Year | CGLUE | County  | Year | CGLUE |
|---------|------|-------|-----------|------|-------|-----------|------|-------|-----------|------|-------|---------|------|-------|
| Chengdu | 2010 | 1.273 | Panzhihua | 2013 | 1.931 | Deyang    | 2015 | 1.226 | Guangyuan | 2017 | 1.210 | Meishan | 2019 | 1.000 |
| Chengdu | 2011 | 1.160 | Panzhihua | 2014 | 1.713 | Deyang    | 2016 | 1.098 | Guangyuan | 2018 | 0.735 | Meishan | 2020 | 0.942 |
| Chengdu | 2012 | 1.369 | Panzhihua | 2015 | 1.786 | Deyang    | 2017 | 1.101 | Guangyuan | 2019 | 0.808 | Yibin   | 2010 | 0.703 |
| Chengdu | 2013 | 1.543 | Panzhihua | 2016 | 2.104 | Deyang    | 2018 | 1.000 | Guangyuan | 2020 | 1.000 | Yibin   | 2011 | 1.007 |
| Chengdu | 2014 | 1.656 | Panzhihua | 2017 | 1.991 | Deyang    | 2019 | 1.002 | Suining   | 2010 | 1.624 | Yibin   | 2012 | 0.694 |
| Chengdu | 2015 | 1.995 | Panzhihua | 2018 | 2.145 | Deyang    | 2020 | 1.035 | Suining   | 2011 | 1.161 | Yibin   | 2013 | 0.664 |
| Chengdu | 2016 | 1.940 | Panzhihua | 2019 | 1.937 | Mianyang  | 2010 | 0.533 | Suining   | 2012 | 1.000 | Yibin   | 2014 | 0.652 |
| Chengdu | 2017 | 1.528 | Panzhihua | 2020 | 1.982 | Mianyang  | 2011 | 0.559 | Suining   | 2013 | 1.000 | Yibin   | 2015 | 0.610 |
| Chengdu | 2018 | 2.434 | Luzhou    | 2010 | 0.674 | Mianyang  | 2012 | 0.583 | Suining   | 2014 | 1.000 | Yibin   | 2016 | 0.588 |
| Chengdu | 2019 | 1.648 | Luzhou    | 2011 | 0.685 | Mianyang  | 2013 | 0.601 | Suining   | 2015 | 1.000 | Yibin   | 2017 | 1.000 |
| Chengdu | 2020 | 1.095 | Luzhou    | 2012 | 0.697 | Mianyang  | 2014 | 0.605 | Suining   | 2016 | 1.011 | Yibin   | 2018 | 0.566 |
| Zigong  | 2010 | 2.215 | Luzhou    | 2013 | 0.679 | Mianyang  | 2015 | 0.615 | Suining   | 2017 | 1.000 | Yibin   | 2019 | 0.601 |
| Zigong  | 2011 | 2.156 | Luzhou    | 2014 | 0.670 | Mianyang  | 2016 | 0.605 | Suining   | 2018 | 1.000 | Yibin   | 2020 | 0.739 |
| Zigong  | 2012 | 1.869 | Luzhou    | 2015 | 0.643 | Mianyang  | 2017 | 0.575 | Suining   | 2019 | 1.000 | Yaan    | 2010 | 1.000 |
| Zigong  | 2013 | 2.036 | Luzhou    | 2016 | 0.589 | Mianyang  | 2018 | 0.765 | Suining   | 2020 | 1.000 | Yaan    | 2011 | 1.011 |
| Zigong  | 2014 | 2.086 | Luzhou    | 2017 | 0.622 | Mianyang  | 2019 | 0.595 | Meishan   | 2010 | 0.983 | Yaan    | 2012 | 1.441 |
| Zigong  | 2015 | 1.552 | Luzhou    | 2018 | 0.538 | Mianyang  | 2020 | 1.021 | Meishan   | 2011 | 0.952 | Yaan    | 2013 | 1.357 |
| Zigong  | 2016 | 1.966 | Luzhou    | 2019 | 0.553 | Guangyuan | 2010 | 0.772 | Meishan   | 2012 | 1.041 | Yaan    | 2014 | 1.650 |
| Zigong  | 2017 | 2.649 | Luzhou    | 2020 | 0.658 | Guangyuan | 2011 | 0.808 | Meishan   | 2013 | 1.033 | Yaan    | 2015 | 1.000 |
| Zigong  | 2018 | 2.535 | Deyang    | 2010 | 1.683 | Guangyuan | 2012 | 1.000 | Meishan   | 2014 | 1.041 | Yaan    | 2016 | 1.202 |
| Zigong  | 2019 | 1.951 | Deyang    | 2011 | 1.208 | Guangyuan | 2013 | 1.000 | Meishan   | 2015 | 1.014 | Yaan    | 2017 | 1.349 |
| Zigong  | 2020 | 1.119 | Deyang    | 2012 | 1.221 | Guangyuan | 2014 | 1.000 | Meishan   | 2016 | 0.874 | Yaan    | 2018 | 1.602 |

[illegible]
